# Supplementary material for: Variable selection methods for identifying predictor interactions in data with repeatedly measured binary outcomes
Source: PubMed Central journal article supplement (PMC8057419; doi:10.1017/cts.2020.556), 2020-11-16
Supplement: S2059866120005567sup001.pdf [file S2059866120005567sup001.pdf]

## Supplementary Materials: Variable selection methods for identifying predictor interactions in data with repeatedly measured binary outcomes

**Table S1:** Mean (SD) for the number of non-zero predictors selected by each approach in Stage 1. All = total number of non-zero predictors selected; Correct = number of true predictors ( $X_5$ ,  $X_1X_2$ , and  $X_2X_5$ ) selected; Null = number of null parameters selected. The effect size is the expected  $\beta$  for the true predictors.

| Effect Size | Obs/Subject | N           | Predictors    | Stepwise      | gmmLasso      | GMMBoost      | GEEBoost      |
|-------------|-------------|-------------|---------------|---------------|---------------|---------------|---------------|
| 0.2         | 2           | 100         | All           | 1.84 (1.94)   | 41.9 (45.8)   | 4.54 (1.25)   | 5.96 (6.95)   |
|             |             |             | Correct       | 0.38 (0.5)    | 1.56 (1.26)   | 0.46 (0.61)   | 0.54 (0.75)   |
|             |             |             | Null          | 1.46 (1.71)   | 40.35 (44.7)  | 4.08 (1.33)   | 5.42 (6.54)   |
|             |             | 200         | All           | 2.51 (2.65)   | 10.17 (14.14) | 4.65 (1.18)   | 7.32 (7.74)   |
|             |             |             | Correct       | 0.56 (0.59)   | 1.23 (1.06)   | 0.77 (0.68)   | 0.91 (0.84)   |
|             |             |             | Null          | 1.95 (2.34)   | 8.93 (13.57)  | 3.88 (1.32)   | 6.4 (7.3)     |
|             |             | 300         | All           | 2.92 (2.63)   | 10.57 (10.14) | 4.62 (1.18)   | 8.51 (8.11)   |
|             |             |             | Correct       | 0.71 (0.61)   | 1.63 (0.99)   | 1.1 (0.77)    | 1.33 (0.94)   |
|             |             |             | Null          | 2.21 (2.32)   | 8.94 (9.63)   | 3.52 (1.44)   | 7.18 (7.61)   |
|             | 500         | All         | 3.6 (2.67)    | 10.64 (8.95)  | 4.34 (1.2)    | 11.56 (8.33)  |               |
|             |             | Correct     | 0.99 (0.56)   | 2.07 (0.92)   | 1.64 (0.75)   | 2.08 (0.86)   |               |
|             |             | Null        | 2.61 (2.4)    | 8.57 (8.56)   | 2.7 (1.44)    | 9.48 (7.93)   |               |
|             | 10          | 100         | All           | 2.35 (1.88)   | 11.97 (10.5)  | 5.31 (2.12)   | 33.92 (17.55) |
|             |             |             | Correct       | 0.66 (0.58)   | 1.94 (0.82)   | 1.49 (0.72)   | 2.2 (0.67)    |
|             |             |             | Null          | 1.69 (1.58)   | 10.03 (10.07) | 3.81 (2.04)   | 31.72 (17.26) |
|             |             | 200         | All           | 3.22 (2.42)   | 30.13 (18.09) | 0.03 (0.36)   | 38.71 (18.19) |
|             |             |             | Correct       | 0.95 (0.62)   | 2.69 (0.47)   | 0.01 (0.15)   | 2.58 (0.51)   |
|             |             |             | Null          | 2.26 (2.08)   | 27.43 (17.99) | 0.02 (0.21)   | 36.13 (18.08) |
| 300         |             | All         | 3.68 (2.42)   | 49.77 (26.82) | *             | 40.41 (19.05) |               |
|             |             | Correct     | 1.1 (0.55)    | 2.89 (0.32)   | *             | 2.72 (0.45)   |               |
|             |             | Null        | 2.58 (2.2)    | 46.89 (26.78) | *             | 37.68 (18.99) |               |
| 500         | All         | 3.7 (2.31)  | 88.5 (9.57)   | *             | 41.63 (16.99) |               |               |
|             | Correct     | 1.16 (0.45) | 2.95 (0.21)   | *             | 2.89 (0.32)   |               |               |
|             | Null        | 2.54 (2.14) | 85.55 (9.55)  | *             | 38.74 (16.99) |               |               |
| 0.7         | 2           | 100         | All           | 3.36 (1.54)   | 40.17 (41.02) | 3.7 (1.05)    | 11.83 (7.53)  |
|             |             |             | Correct       | 1.1 (0.44)    | 2.69 (0.73)   | 2.08 (0.67)   | 2.54 (0.64)   |
|             |             |             | Null          | 2.26 (1.41)   | 37.48 (40.78) | 1.62 (1.16)   | 9.3 (7.27)    |
|             |             | 200         | All           | 4.01 (2.38)   | 16.07 (13.04) | 3.24 (0.73)   | 15.26 (7.98)  |
|             |             |             | Correct       | 1.22 (0.5)    | 2.95 (0.28)   | 2.68 (0.49)   | 2.95 (0.21)   |
|             |             |             | Null          | 2.79 (2.18)   | 13.13 (13)    | 0.56 (0.73)   | 12.3 (7.97)   |
|             |             | 300         | All           | 4 (2.37)      | 16.74 (10.87) | 3.13 (0.52)   | 16.01 (8.84)  |
|             |             |             | Correct       | 1.21 (0.5)    | 2.99 (0.08)   | 2.88 (0.33)   | 2.99 (0.09)   |
|             |             |             | Null          | 2.79 (2.18)   | 13.75 (10.87) | 0.25 (0.5)    | 13.02 (8.85)  |
|             | 500         | All         | 4.1 (2.49)    | 18.3 (10.59)  | 3.05 (0.27)   | 16.65 (8.78)  |               |
|             |             | Correct     | 1.23 (0.53)   | 3 (0)         | 2.98 (0.15)   | 3 (0)         |               |
|             |             | Null        | 2.87 (2.3)    | 15.3 (10.59)  | 0.07 (0.26)   | 13.65 (8.78)  |               |
|             | 2           | 100         | All           | 3.59 (1.41)   | 18.89 (17.33) | 3.14 (0.72)   | 14.08 (5.68)  |
|             |             |             | Correct       | 1.21 (0.46)   | 2.9 (0.42)    | 2.73 (0.47)   | 3 (0.04)      |
|             |             |             | Null          | 2.38 (1.32)   | 15.98 (17.27) | 0.41 (0.61)   | 11.08 (5.68)  |
|             |             | 200         | All           | 4.37 (2.4)    | 18.93 (14.17) | 3.01 (0.38)   | 15.87 (6.32)  |
|             |             |             | Correct       | 1.3 (0.63)    | 3 (0)         | 2.92 (0.27)   | 3 (0)         |
|             |             |             | Null          | 3.07 (2.13)   | 15.93 (14.17) | 0.09 (0.29)   | 12.87 (6.32)  |
| 300         |             | All         | 4.65 (2.6)    | 18.63 (11.63) | 2.98 (0.26)   | 17.17 (6.9)   |               |
|             |             | Correct     | 1.28 (0.63)   | 3 (0)         | 2.96 (0.21)   | 3 (0)         |               |
|             |             | Null        | 3.38 (2.31)   | 15.63 (11.63) | 0.02 (0.15)   | 14.17 (6.9)   |               |
| 500         | All         | 4.81 (2.6)  | 18.46 (10.74) | 2.99 (0.09)   | 16.65 (8.78)  |               |               |
|             | Correct     | 1.35 (0.72) | 3 (0)         | 2.99 (0.09)   | 3 (0)         |               |               |
|             | Null        | 3.47 (2.29) | 15.46 (10.74) | 0 (0)         | 13.65 (8.78)  |               |               |

\* GMMBoost was not run for data with 10 observations per subject at  $n = 300$  or  $n = 500$  due to excessive computing time.

**Table S2:** Mean squared error (MSE) and average bias for  $\hat{\beta}$  estimates for variables  $X_5$ ,  $X_1X_2$ , and  $X_2X_5$  and the range of MSE and bias for null predictors ( $X_{Null}$ ) from stage 1 and stage 2 models in data with 2 observations per subject. Second stage models are only fit for penalized regression approaches.

| $\beta$   | Model     | N     | $X_5$   |        |         |        | $X_1X_2$ |        |         |        | $X_2X_5$ |        |         |              | $X_{Null}$    |               |               |               |
|-----------|-----------|-------|---------|--------|---------|--------|----------|--------|---------|--------|----------|--------|---------|--------------|---------------|---------------|---------------|---------------|
|           |           |       | Stage 1 |        | Stage 2 |        | Stage 1  |        | Stage 2 |        | Stage 1  |        | Stage 2 |              | Stage 1       |               | Stage 2       |               |
|           |           |       | MSE     | Bias   | MSE     | Bias   | MSE      | Bias   | MSE     | Bias   | MSE      | Bias   | MSE     | Bias         | MSE           | Bias          | MSE           | Bias          |
| 0.2       | Stepwise  | 100   | 0.058   | -0.102 | -       | -      | 0.040    | -0.199 | -       | -      | 0.040    | -0.198 | -       | -            | 0, 0.019      | 0, 0.006      | -             | -             |
|           |           | 200   | 0.035   | -0.090 | -       | -      | 0.040    | -0.196 | -       | -      | 0.039    | -0.188 | -       | -            | 0, 0.012      | 0, 0.024      | -             | -             |
|           |           | 300   | 0.030   | -0.079 | -       | -      | 0.040    | -0.196 | -       | -      | 0.038    | -0.185 | -       | -            | 0, 0.008      | 0, 0.011      | -             | -             |
|           |           | 500   | 0.024   | -0.066 | -       | -      | 0.040    | -0.197 | -       | -      | 0.036    | -0.177 | -       | -            | 0, 0.007      | 0, 0.024      | -             | -             |
|           | glimLasso | 100   | 2.309   | 0.021  | 0.043   | -0.162 | 0.918    | 0.214  | 0.060   | -0.107 | 1.301    | 0.275  | 0.056   | -0.119       | 6.602, 261.4  | -2.68, 1.55   | 182, 7195     | -7.81, 5.58   |
|           |           | 200   | 0.033   | -0.153 | 0.036   | -0.121 | 0.043    | -0.107 | 0.034   | -0.063 | 0.038    | -0.127 | 0.033   | -0.080       | 0.002, 0.229  | -0.160, 0.344 | 0.003, 0.389  | -0.028, 0.059 |
|           |           | 300   | 0.026   | -0.132 | 0.029   | -0.092 | 0.024    | -0.109 | 0.021   | -0.053 | 0.023    | -0.111 | 0.024   | -0.055       | 0.001, 0.051  | -0.013, 0.084 | 0.001, 0.092  | -0.007, 0.052 |
|           |           | 500   | 0.022   | -0.118 | 0.022   | -0.068 | 0.017    | -0.100 | 0.014   | -0.038 | 0.018    | -0.102 | 0.016   | -0.040       | 0.000, 0.020  | -0.005, 0.030 | 0.000, 0.052  | -0.006, 0.037 |
|           | GMMBoost  | 100   | 0.038   | -0.192 | 0.041   | -0.169 | 0.034    | -0.176 | 0.051   | -0.103 | 0.036    | -0.183 | 0.048   | -0.125       | 0.000, 0.060  | -0.002, 0.015 | 0.000, 0.661  | -0.010, 0.091 |
|           |           | 200   | 0.036   | -0.186 | 0.037   | -0.158 | 0.032    | -0.168 | 0.035   | -0.083 | 0.034    | -0.178 | 0.035   | -0.109       | 0.000, 0.012  | -0.002, 0.011 | 0.000, 0.090  | -0.006, 0.076 |
|           |           | 300   | 0.034   | -0.181 | 0.032   | -0.141 | 0.030    | -0.167 | 0.027   | -0.084 | 0.031    | -0.167 | 0.028   | -0.085       | 0.000, 0.008  | -0.000, 0.001 | 0.000, 0.110  | -0.006, 0.095 |
|           |           | 500   | 0.031   | -0.171 | 0.026   | -0.114 | 0.027    | -0.155 | 0.017   | -0.055 | 0.027    | -0.158 | 0.019   | -0.058       | 0.000, 0.001  | -0.000, 0.006 | 0.000, 0.127  | -0.005, 0.103 |
|           | GEEBoost  | 100   | 0.037   | -0.188 | 0.046   | -0.165 | 0.034    | -0.167 | 0.089   | -0.077 | 0.034    | -0.172 | 0.058   | -0.102       | 0.013, 2.063  | -0.842, 6.374 | 0.001, 0.179  | -0.012, 0.097 |
|           |           | 200   | 0.036   | -0.185 | 0.038   | -0.159 | 0.028    | -0.152 | 0.035   | -0.064 | 0.031    | -0.164 | 0.035   | -0.089       | 0.001, 0.156  | -0.044, 0.298 | 0.001, 0.125  | -0.013, 0.087 |
|           |           | 300   | 0.033   | -0.176 | 0.032   | -0.142 | 0.025    | -0.146 | 0.023   | -0.058 | 0.026    | -0.146 | 0.026   | -0.059       | 0.000, 0.076  | -0.006, 0.087 | 0.001, 0.164  | -0.007, 0.121 |
|           |           | 500   | 0.028   | -0.159 | 0.024   | -0.111 | 0.018    | -0.118 | 0.012   | -0.027 | 0.019    | -0.122 | 0.013   | -0.029       | 0.000, 0.041  | -0.003, 0.037 | 0.000, 0.152  | -0.009, 0.128 |
| Stepwise  | 100       | 0.278 | -0.338  | -      | -       | 0.490  | -0.698   | -      | -       | 0.428  | -0.608   | -      | -       | 0, 0.082     | 0, 0.097      | -             | -             |               |
|           | 200       | 0.200 | -0.296  | -      | -       | 0.485  | -0.687   | -      | -       | 0.405  | -0.586   | -      | -       | 0, 0.070     | 0, 0.094      | -             | -             |               |
|           | 300       | 0.220 | -0.334  | -      | -       | 0.480  | -0.682   | -      | -       | 0.412  | -0.597   | -      | -       | 0, 0.121     | 0, 0.075      | -             | -             |               |
|           | 500       | 0.206 | -0.342  | -      | -       | 0.479  | -0.682   | -      | -       | 0.407  | -0.595   | -      | -       | 0, 0.126     | 0, 0.075      | -             | -             |               |
| glimLasso | 100       | 3.083 | 0.138   | 0.534  | -0.276  | 3.799  | 0.683    | 1.015  | -0.031  | 4.419  | 0.722    | 0.757  | -0.074  | 6.306, 249.1 | -6.621, 8.793 | 145, 5735     | -4.41, 5.86   |               |
|           | 200       | 0.114 | -0.260  | 0.097  | -0.116  | 0.082  | -0.176   | 0.056  | 0.040   | 0.086  | -0.223   | 0.055  | 0.014   | 0.004, 0.031 | -0.061, 0.185 | 0.006, 0.051  | -0.012, 0.038 |               |
|           | 300       | 0.072 | -0.217  | 0.061  | -0.089  | 0.050  | -0.178   | 0.023  | 0.021   | 0.057  | -0.199   | 0.025  | 0.010   | 0.001, 0.014 | -0.038, 0.130 | 0.002, 0.026  | -0.010, 0.034 |               |
|           | 500       | 0.053 | -0.200  | 0.038  | -0.093  | 0.042  | -0.181   | 0.013  | -0.013  | 0.046  | -0.191   | 0.014  | -0.013  | 0.001, 0.007 | -0.051, 0.143 | 0.002, 0.012  | -0.008, 0.021 |               |
| GMMBoost  | 100       | 0.362 | -0.589  | 0.231  | -0.332  | 0.299  | -0.530   | 0.124  | -0.089  | 0.354  | -0.580   | 0.211  | -0.190  | 0, 0.014     | -0.001, 0.012 | 0, 0.234      | -0.006, 0.122 |               |
|           | 200       | 0.307 | -0.543  | 0.111  | -0.174  | 0.274  | -0.515   | 0.039  | -0.034  | 0.332  | -0.568   | 0.087  | -0.093  | 0, 0.001     | -0.000, 0.001 | 0, 0.082      | -0.004, 0.063 |               |
|           | 300       | 0.295 | -0.536  | 0.053  | -0.094  | 0.266  | -0.510   | 0.020  | -0.023  | 0.324  | -0.564   | 0.045  | -0.054  | 0, 0.001     | 0, 0.001      | 0, 0.032      | -0.001, 0.025 |               |
|           | 500       | 0.284 | -0.529  | 0.019  | -0.053  | 0.271  | -0.518   | 0.011  | -0.039  | 0.320  | -0.562   | 0.016  | -0.041  | 0, 0         | 0, 0.001      | 0, 0.008      | 0, 0.006      |               |
|           |           | 100   | 0.299   | -0.524 | 1.348   | -0.240 | 0.194    | -0.409 | 1.312   | 0.193  | 0.240    | -0.454 | 2.665   | 0.163        | 0.025, 3.050  | -0.575, 2.153 | 0.004, 0.532  | -0.045, 0.168 |

|     |           |     |       |        |       |        |       |        |        |        |       |        |       |        |              |               |              |               |
|-----|-----------|-----|-------|--------|-------|--------|-------|--------|--------|--------|-------|--------|-------|--------|--------------|---------------|--------------|---------------|
|     | GEEBoost  | 200 | 0.188 | -0.407 | 0.121 | -0.212 | 0.110 | -0.305 | 0.043  | 0.047  | 0.137 | -0.343 | 0.042 | 0.030  | 0.002, 0.056 | -0.042, 0.195 | 0.003, 0.084 | -0.018, 0.083 |
|     |           | 300 | 0.146 | -0.361 | 0.084 | -0.189 | 0.082 | -0.267 | 0.021  | 0.023  | 0.101 | -0.298 | 0.023 | 0.014  | 0.001, 0.019 | -0.039, 0.174 | 0.002, 0.036 | -0.014, 0.062 |
|     |           | 500 | 0.105 | -0.307 | 0.050 | -0.152 | 0.066 | -0.242 | 0.012  | -0.013 | 0.076 | -0.262 | 0.012 | -0.011 | 0.000, 0.011 | -0.029, 0.147 | 0.001, 0.018 | -0.008, 0.040 |
|     | Stepwise  | 100 | 1.528 | -1.038 | -     | -      | 2.225 | -1.476 | -      | -      | 1.920 | -1.310 | -     | -      | 0, 0.318     | 0, 0.282      | -            | -             |
|     |           | 200 | 1.486 | -1.037 | -     | -      | 2.156 | -1.424 | -      | -      | 1.827 | -1.241 | -     | -      | 0, 0.509     | 0, 0.171      | -            | -             |
|     |           | 300 | 1.785 | -1.197 | -     | -      | 2.086 | -1.387 | -      | -      | 1.876 | -1.275 | -     | -      | 0, 0.631     | 0, 0.118      | -            | -             |
|     |           | 500 | 1.887 | -1.256 | -     | -      | 2.032 | -1.354 | -      | -      | 1.818 | -1.238 | -     | -      | 0, 0.751     | 0, 0.079      | -            | -             |
| 1.5 | glmmLasso | 100 | 1.234 | -0.477 | 4.116 | 0.176  | 2.154 | -0.229 | 16.051 | 0.788  | 1.339 | -0.423 | 9.643 | 0.630  | 0.513, 34.00 | -1.623, 1.631 | 7.69, 509.1  | -1.20, 1.20   |
|     |           | 200 | 0.288 | -0.433 | 0.169 | -0.054 | 0.271 | -0.394 | 0.169  | 0.134  | 0.350 | -0.461 | 0.179 | 0.105  | 0.008, 0.093 | -0.336, 0.908 | 0.016, 0.178 | -0.033, 0.090 |
|     |           | 300 | 0.210 | -0.419 | 0.113 | -0.057 | 0.184 | -0.381 | 0.142  | 0.099  | 0.228 | -0.431 | 0.129 | 0.085  | 0.004, 0.023 | -0.169, 0.478 | 0.009, 0.047 | -0.021, 0.060 |
|     |           | 500 | 0.159 | -0.376 | 0.048 | -0.084 | 0.161 | -0.376 | 0.029  | 0.004  | 0.183 | -0.398 | 0.032 | 0.002  | 0.002, 0.010 | -0.210, 0.454 | 0.004, 0.019 | -0.017, 0.037 |
|     | GMMBoost  | 100 | 1.481 | -1.206 | 0.369 | -0.195 | 1.426 | -1.185 | 0.297  | -0.002 | 1.846 | -1.353 | 0.579 | -0.197 | 0, 0         | 0, 0          | 0.000, 0.107 | -0.004, 0.085 |
|     |           | 200 | 1.396 | -1.176 | 0.107 | -0.076 | 1.434 | -1.194 | 0.060  | -0.034 | 1.841 | -1.354 | 0.226 | -0.105 | 0, 0         | 0, 0          | 0, 0.026     | -0.002, 0.025 |
|     |           | 300 | 1.412 | -1.185 | 0.051 | -0.044 | 1.435 | -1.195 | 0.050  | -0.027 | 1.823 | -1.348 | 0.144 | -0.075 | 0, 0         | 0, 0          | 0, 0.005     | 0, 0.006      |
|     |           | 500 | 1.410 | -1.186 | 0.025 | -0.055 | 1.441 | -1.199 | 0.025  | -0.056 | 1.819 | -1.348 | 0.046 | -0.058 | 0, 0         | 0, 0          | 0, 0         | 0, 0          |
|     | GEEBoost  | 100 | 0.839 | -0.887 | 4.278 | 0.155  | 0.640 | -0.773 | 7.739  | 0.885  | 0.855 | -0.900 | 6.184 | 0.756  | 0.010, 2,471 | -0.520, 2,353 | 0.008, 2,007 | -0.073, 0.329 |
|     |           | 200 | 0.545 | -0.714 | 0.196 | -0.202 | 0.426 | -0.632 | 0.116  | 0.139  | 0.552 | -0.724 | 0.119 | 0.096  | 0.002, 0.071 | -0.128, 0.556 | 0.004, 0.098 | -0.032, 0.140 |
|     |           | 300 | 0.418 | -0.629 | 0.116 | -0.168 | 0.324 | -0.549 | 0.081  | 0.082  | 0.406 | -0.620 | 0.073 | 0.062  | 0.001, 0.029 | -0.082, 0.437 | 0.002, 0.058 | -0.019, 0.102 |
|     |           | 500 | 0.313 | -0.546 | 0.073 | -0.165 | 0.254 | -0.490 | 0.027  | 0.002  | 0.312 | -0.544 | 0.033 | -0.001 | 0.001, 0.013 | -0.091, 0.468 | 0.001, 0.018 | -0.008, 0.040 |

**Table S3:** Average computation time in minutes for each methods by number of observations per subject and sample size.

| <b>Method</b> | <b>Observations/Subject</b> | <b>N</b> | <b>Computation Time<br/>(min)</b> |
|---------------|-----------------------------|----------|-----------------------------------|
| glmmLasso     | 2                           | 100      | 1.37                              |
|               |                             | 200      | 4.39                              |
|               |                             | 300      | 6.99                              |
|               |                             | 500      | 35.29                             |
|               | 10                          | 100      | 3.11                              |
|               |                             | 200      | 15.41                             |
|               |                             | 300      | 43.65                             |
|               |                             | 500      | 246.905                           |
| GMMBoost      | 2                           | 100      | 0.69                              |
|               |                             | 200      | 4.42                              |
|               |                             | 300      | 14.04                             |
|               |                             | 500      | 62.42                             |
|               | 10                          | 100      | 37.95                             |
|               |                             | 200      | 406.1                             |
|               |                             | 300      | 1394.13                           |
|               |                             | 500      |                                   |
| GEEBoost      | 2                           | 100      | 1.44                              |
|               |                             | 200      | 5.54                              |
|               |                             | 300      | 12.57                             |
|               |                             | 500      | 36.43                             |
|               | 10                          | 100      | 2.26                              |
|               |                             | 200      | 7.25                              |
|               |                             | 300      | 17.84                             |
|               |                             | 500      | 45.22                             |

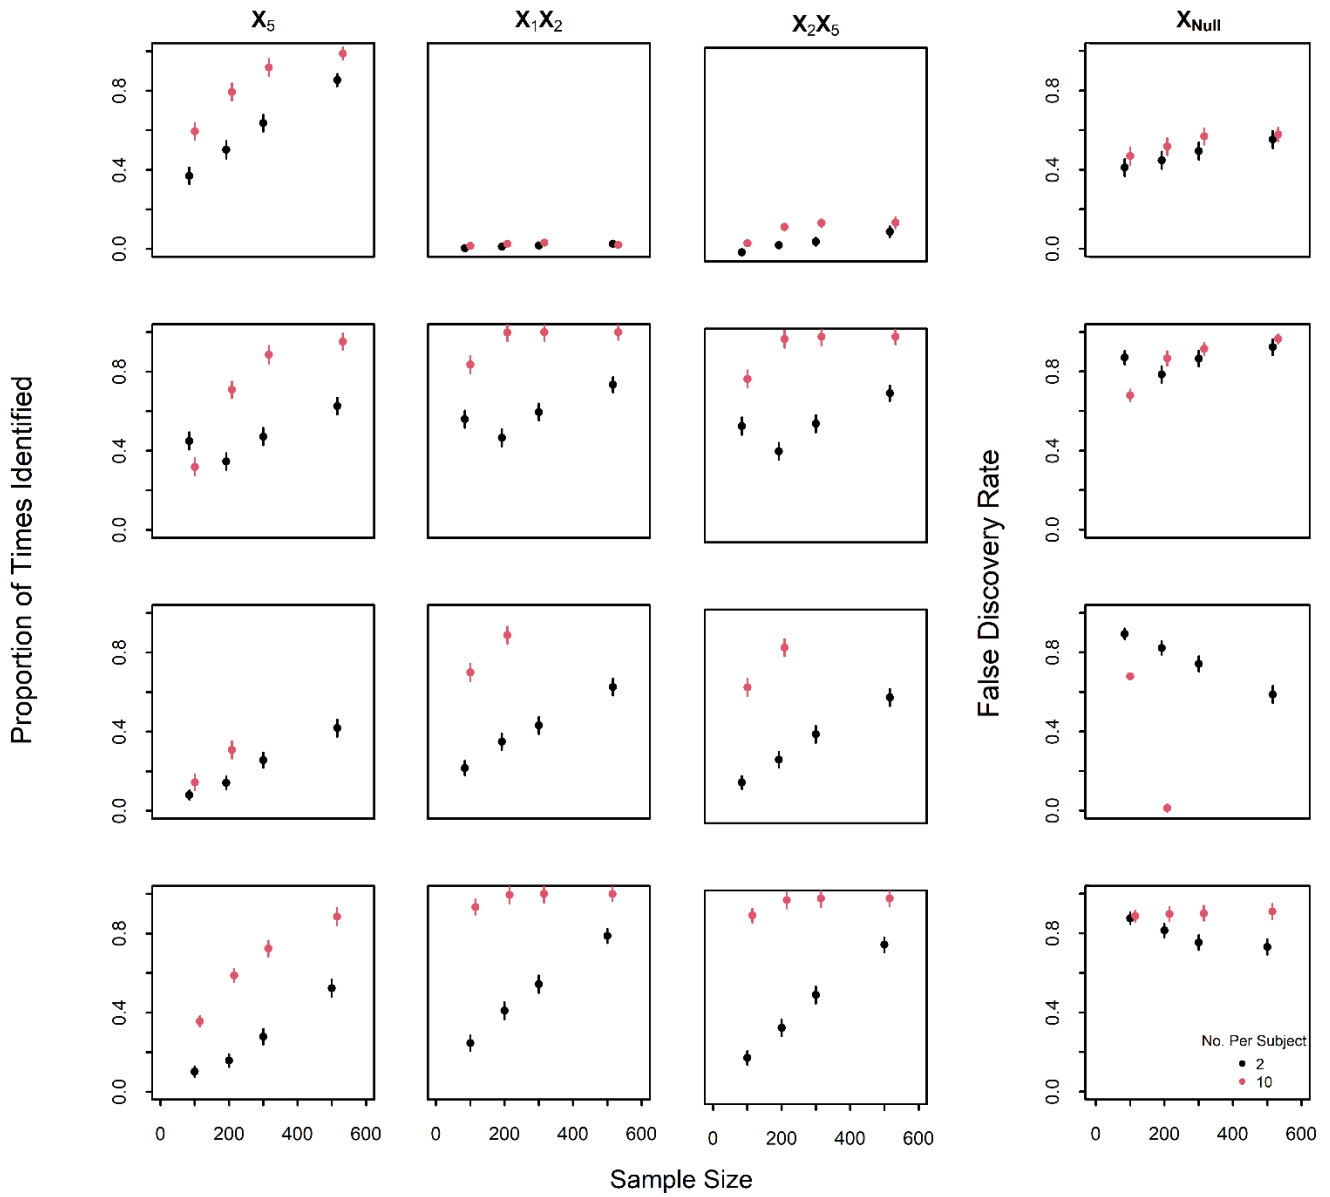

**Figure S1:** Proportion of times the true predictors,  $X_5$ ,  $X_1X_2$ , and  $X_2X_5$  and the average FDR for null predictors ( $X_{Null}$ ) selected by each methods for simulated data with 2 or 10 repeated measures per subject in data with effect size = 0.2 as sample size increases. Black circles represent the proportion for data with 2 measures/subject and red circles represent the proportion for 10 measures/subject.

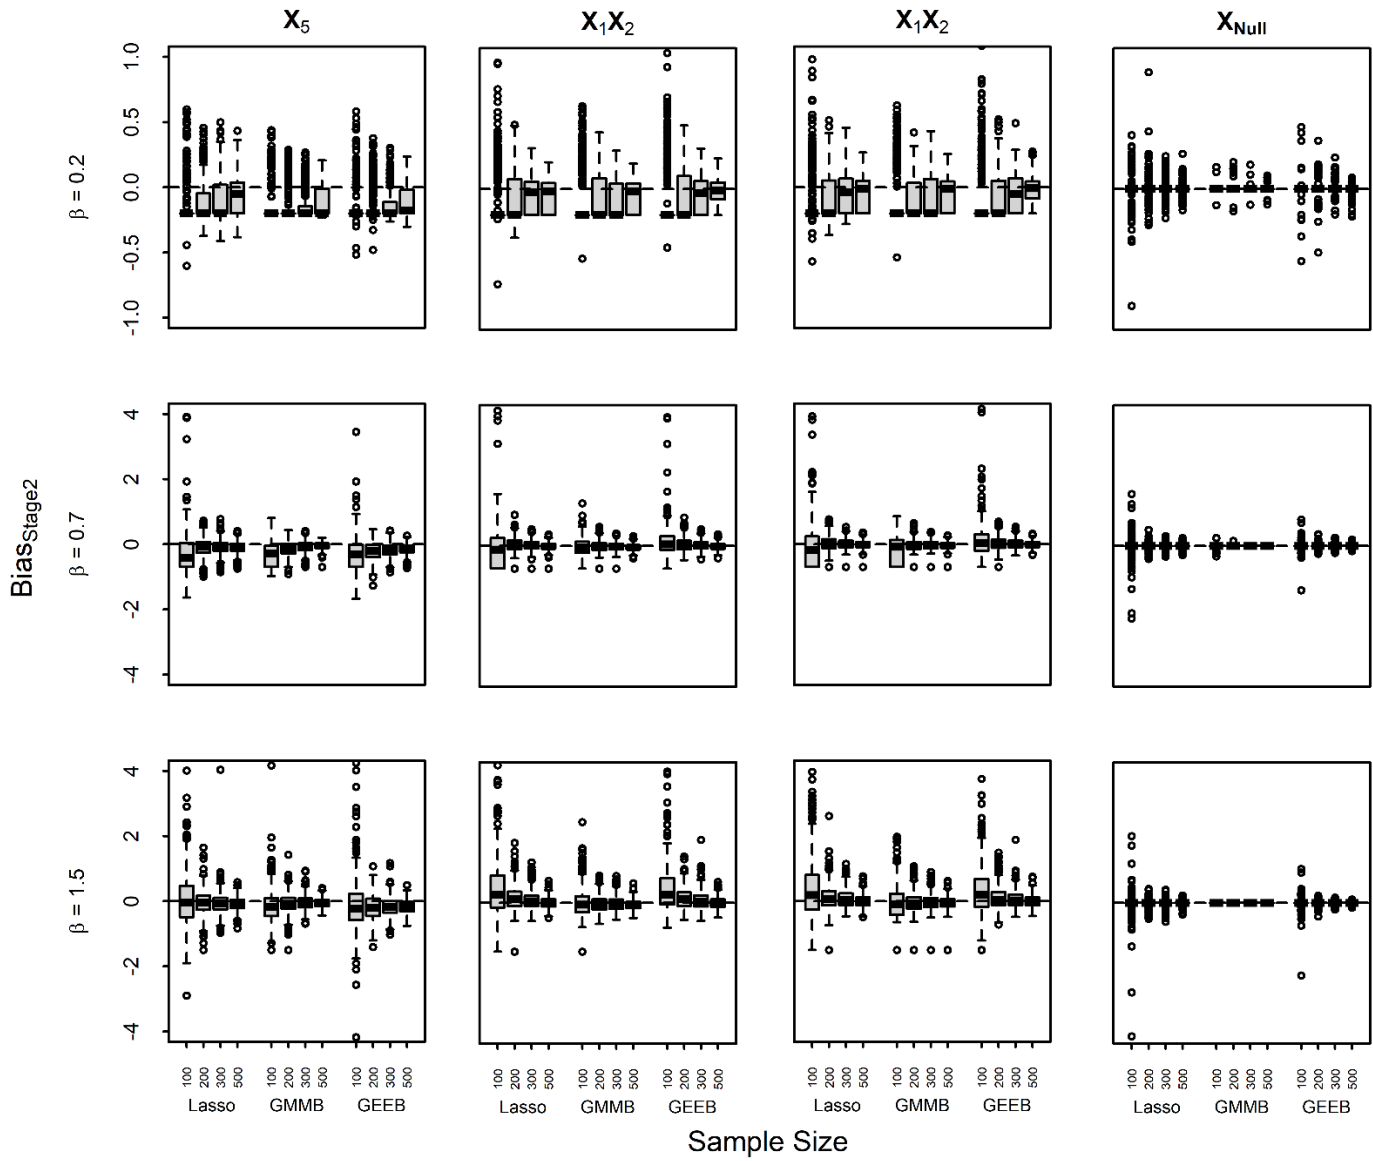

**Figure S2:** Boxplots of bias for the stage 2 models across all simulation runs for glmLasso (Lasso), GMMBoost (GMMB), and GEEBoost (GEEB) models in data with 2 repeated measures per subject. Boxes represent the 25<sup>th</sup>, 50<sup>th</sup>, and 75<sup>th</sup> percentiles, whiskers extend 1.5\*inner quartile range (IQR) from the 25<sup>th</sup> and 75<sup>th</sup> percentiles and points are values outside 1.5\*IQR. The grey dashed line indicates bias = 0.

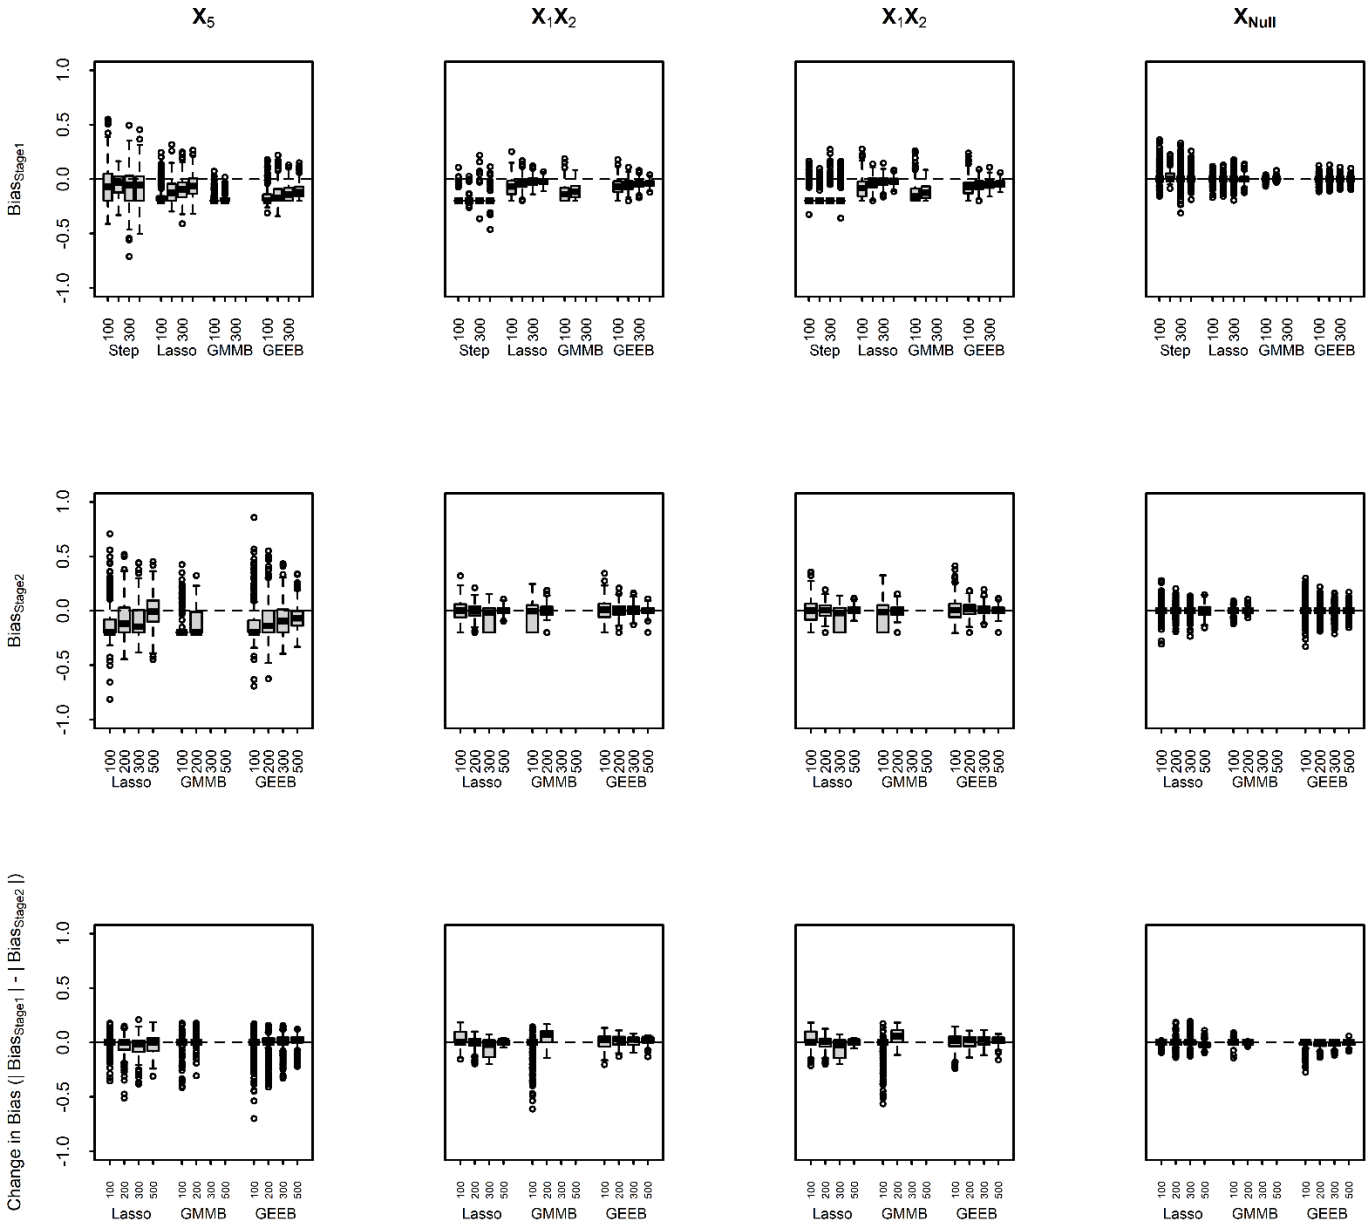

**Figure S3:** Boxplots of bias for the stage 1, stage 2, and the change in bias from stage 1 to stage 2 across all simulation runs for stepwise (Step), glmLasso (Lasso), GMMBoost (GMMB), and GEEBoost (GEEB) models in data with 10 repeated measures per subject. Note, stepwise models are fitted in a single stage and therefore are only represented for stage 1 bias. Also GMMBoost models with 300 and 500 observations were not run due to computational constraints. Boxes represent the 25<sup>th</sup>, 50<sup>th</sup>, and 75<sup>th</sup> percentiles, whiskers extend 1.5\*inner quartile range (IQR) from the 25<sup>th</sup> and 75<sup>th</sup> percentiles and points are values outside 1.5\*IQR. The grey dashed line indicates bias = 0.
